# Supplementary material for: Molecular Docking Studies of a Cyclic Octapeptide-Cyclosaplin from Sandalwood
Source: PubMed Central journal article supplement (PMC6920920; doi:10.3390/biom9110740), 2019-11-15
Supplement: biomolecules-09-00740-s001.pdf [file biomolecules-09-00740-s001.pdf]

## Supplementary Figures

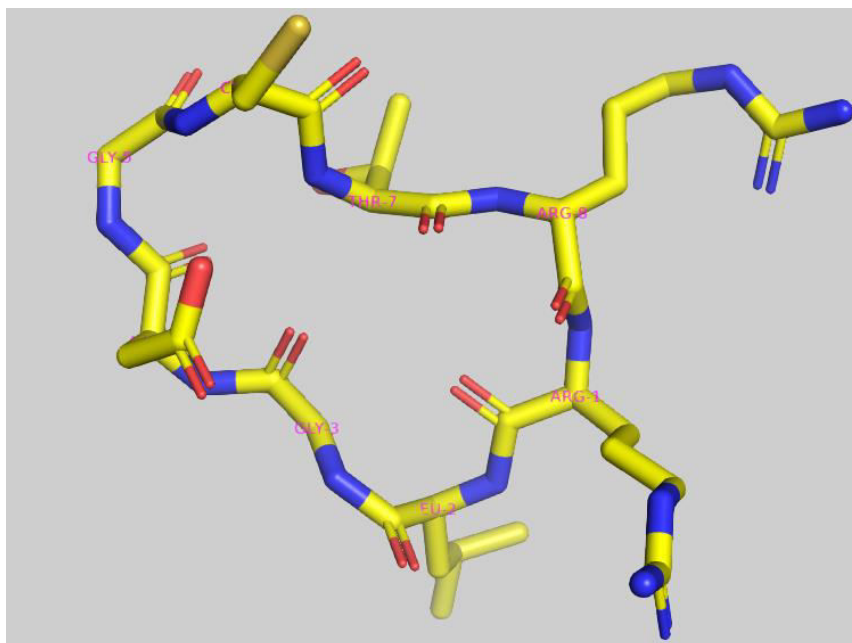

**Fig. S1** The energy minimized structure of cyclosporin

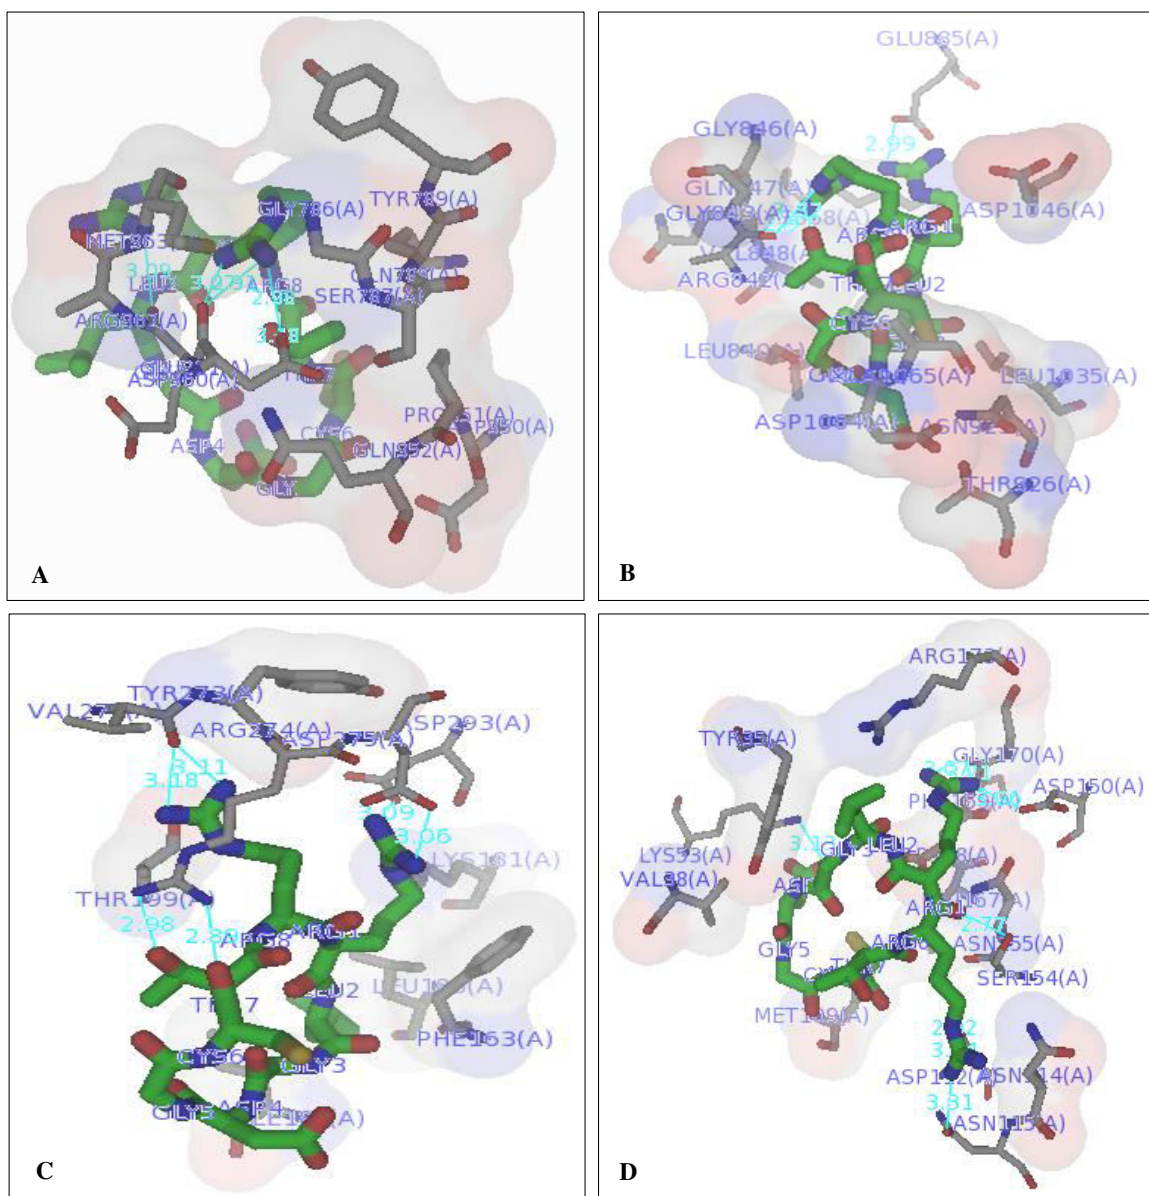

**Fig. S2** Interaction of cyclosaplin with various cancer-related proteins using LigPlot (3D representation). A) EGFR Kinase B) VEGFR2 Kinase C) PKB D) p38.

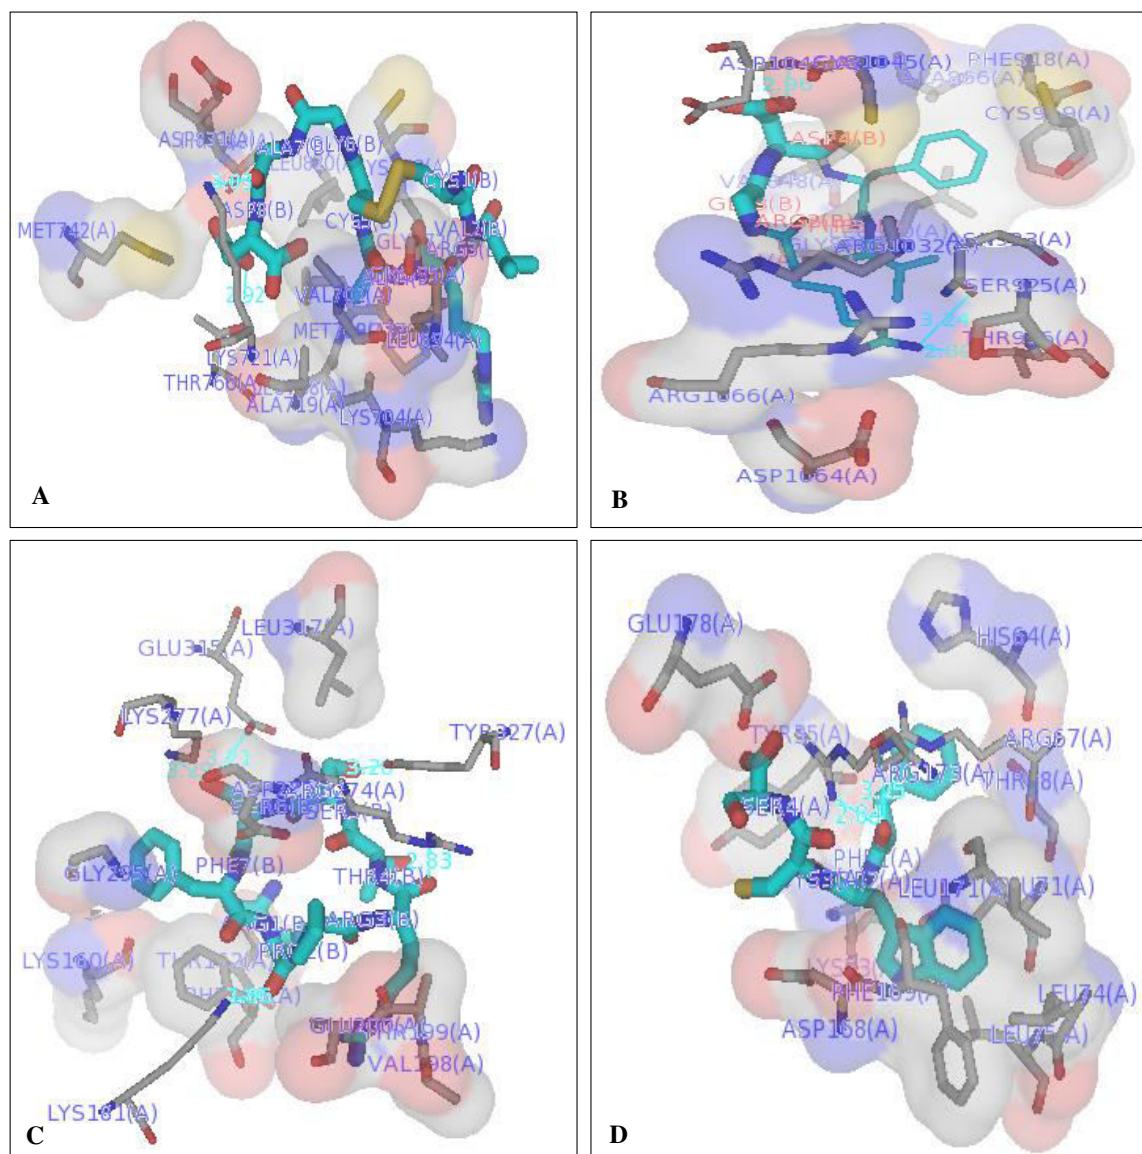

**Fig. S3** Interaction of a few peptide-based ligands with various cancer-related proteins using LigPlot (3D representation). A) CVRACGAD and EGFR kinase B) Cilengitide and VEGFR2 kinase C) RPRTSSF and PKB D) FWCS and p38.

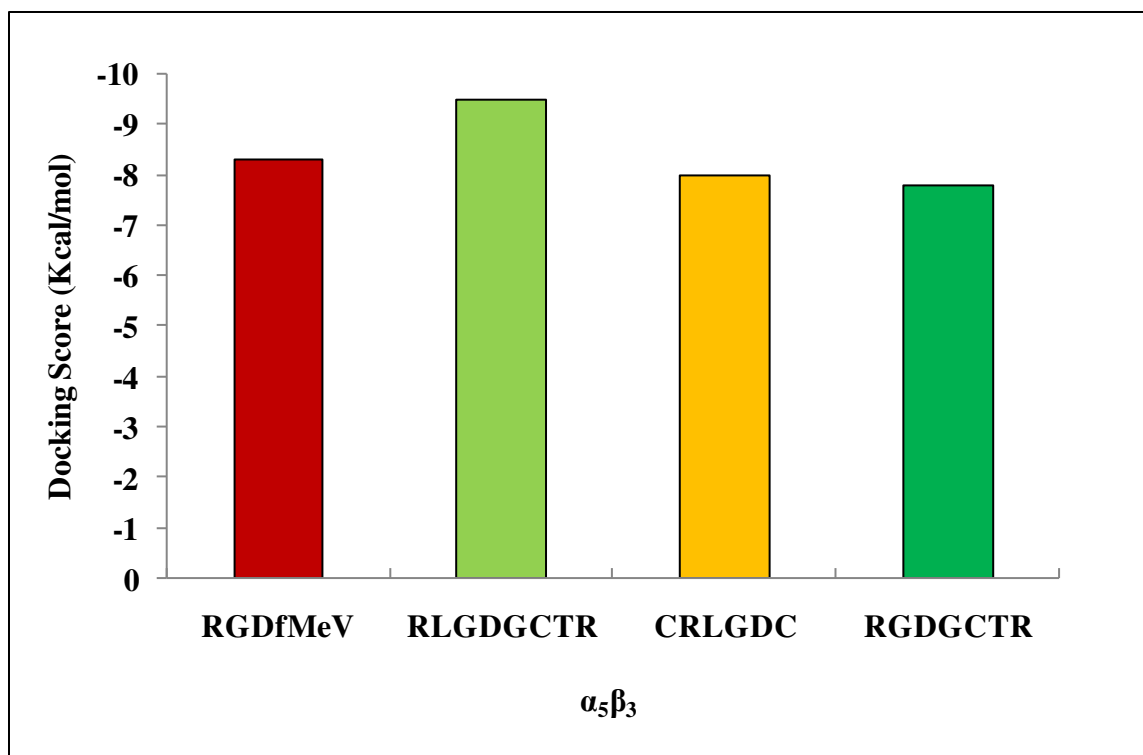

**Fig. S4** Relative binding affinities (Kcal/mol) of RGD-like peptides towards integrin  $\alpha_5\beta_3$

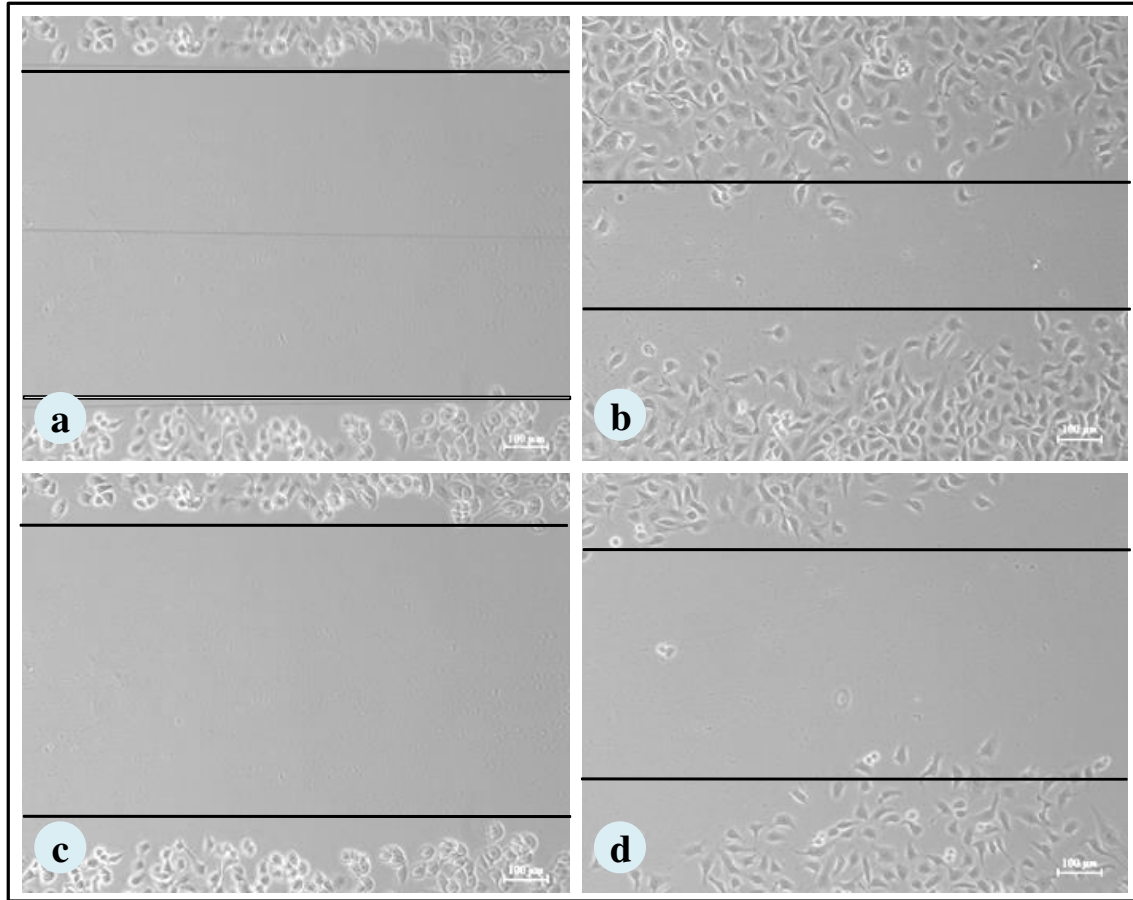

**Fig. S5** Scratch assay/Cell migration assay. a) Control MDA-MB-231 cells at 0 h b) Control MDA-MB-231 cells at 12 h c) Cyclosaplin (10 μg/mL) treated MDA-MB-231 cells at 0 h d) Cyclosaplin (10 μg/mL) treated MDA-MB-231 cells at 12 h. Scale bar = 100 μm.

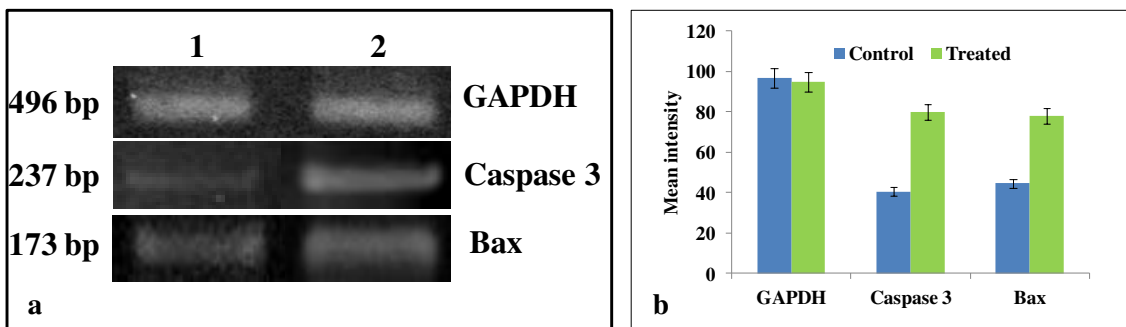

**Fig. S6** Reverse transcriptase polymerase chain reaction (RT-PCR) for GAPDH, Caspase 3 and Bax mRNA in cyclosaplin induced MDA-MB-231 cells. a) Lane 1: Control (Untreated), Lane 2: Treated (cyclosaplin, 10 μg/mL ) for 24 h. b) Bands were analyzed using image J software and represented as mean intensity (arbitrary units).

**Table S1** The binding affinities of cyclosaplin along with its analogues towards integrin  $\alpha_5\beta_3$

| <b>Peptide</b>         | <b>Binding affinities (Kcal/mol)</b> |
|------------------------|--------------------------------------|
| RGDfMev (Cilengitide)  | -8.3                                 |
| RLGDGCTR (Cyclosaplin) | -9.5                                 |
| CRLGDC (Analogue I)    | -8.0                                 |
| RGDGCTR (Analogue II)  | -7.8                                 |
